- saline for fluid resuscitation in the intensive care unit. *N Engl J Med* 2004; 350:2247–56
14. Chappell D, Jacob M: Protocols, physiology, and trials of hydroxyethyl starch. *N Engl J Med* 2012; 367:1266; author reply 1267
  15. James MF, Michell WL, Joubert IA, Nicol AJ, Navsaria PH, Gillespie RS: Resuscitation with hydroxyethyl starch improves renal function and lactate clearance in penetrating trauma in a randomized controlled study: The FIRST trial (Fluids in Resuscitation of Severe Trauma). *Br J Anaesth* 2011; 107: 693–702
  16. Guidet B, Martinet O, Boulain T, Philippart F, Poussel JF, Maizel J, Forceville X, Feissel M, Hasselmann M, Heininger A, Van Aken H: Assessment of hemodynamic efficacy and safety of 6% hydroxyethylstarch 130/0.4 vs. 0.9% NaCl fluid replacement in patients with severe sepsis: The CRYSTMAS study. *Crit Care* 2012; 16:R94
  17. Myburgh JA, Finfer S, Bellomo R, Billot L, Cass A, Gattas D, Glass P, Lipman J, Liu B, McArthur C, McGuinness S, Rajbhandari D, Taylor CB, Webb SA; the CHEST Investigators and the Australian and New Zealand Intensive Care Society Clinical Trials Group: Hydroxyethyl starch or saline for fluid resuscitation in intensive care. *N Engl J Med* 2012; 367:1901–11
  18. Van Der Linden P, James M, Mythen M, Weiskopf RB: Safety of Modern Starches Used During Surgery. *Anesth Analg* 2012; DOI: 10.1213/ANE.0b013e31827175da
  19. Citanova ML, Leblanc I, Legendre C, Mouquet C, Riou B, Coriat P: Effect of hydroxyethylstarch in brain-dead kidney donors on renal function in kidney-transplant recipients. *Lancet* 1996; 348:1620–2

## ANESTHESIOLOGY REFLECTIONS FROM THE WOOD LIBRARY-MUSEUM

### Starkey's Compound Oxygen as a Hygienic for Ailments Chronic

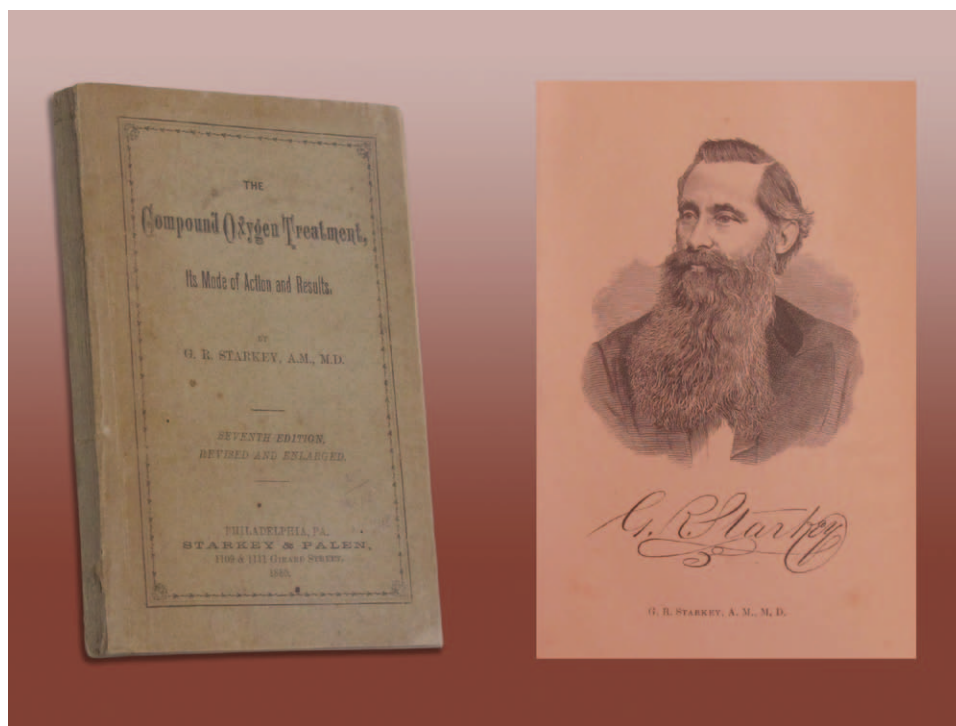

Following Quaker schooling in Rhode Island and college in his native Maine, George Rogers Starkey (1823–1896) graduated from the Homeopathic Medical College of Pennsylvania in 1855. By 1869 frail health forced Starkey to abandon teaching anatomy and surgery at his medical *alma mater*, which had since been renamed Hahnemann Medical College. As a general cure for chronic diseases, the “Compound Oxygen” he peddled would evolve from the inhaling of dilute concentrations of nitrous oxide to the imbibing of bottled aqueous nitrate solutions of ammonia and lead. Delighted to sell his Compound to both homeopaths and allopaths, Starkey considered Compound Oxygen as a system of hygiene supplementing whatever other physicians prescribed. (Copyright © the American Society of Anesthesiologists, Inc.)

George S. Bause, M.D., M.P.H., Honorary Curator, ASA's Wood Library-Museum of Anesthesiology, Park Ridge, Illinois, and Clinical Associate Professor, Case Western Reserve University, Cleveland, Ohio. UJYC@aol.com.
